# Supplementary material for: Effect of a Novel Macrophage-Regulating Drug on Wound Healing in Patients With Diabetic Foot Ulcers: A Randomized Clinical Trial
Source: PubMed Central journal article supplement — JAMA Netw Open. 2021 Sep 3;4(9):e2122607. doi: 10.1001/jamanetworkopen.2021.22607 (PMC8417758; doi:10.1001/jamanetworkopen.2021.22607), 2021-09-03
Supplement: jamanetwopen-e2122607-s002.pdf [file jamanetwopen-e2122607-s002.pdf]

## Supplementary Online Content

Huang YY, Lin CW, Cheng NC, et al. Effect of a novel macrophage-regulating drug on wound healing in patients with diabetic foot ulcers: a randomized clinical trial. *JAMA Network Open*. 2021;4(9):e2122607. doi:10.1001/jamanetworkopen.2021.22607

**eMethods 1.** Randomization Plan

**eMethods 2.** Procedure of Healing Judgment by Independent Evaluator

**eTable 1.** Institutional Review Board Approval Information of 21 Medical Centers

**eTable 2.** Efficacy and Safety Outcomes of the mITT Population

**eTable 3.** Hematology, Biochemistry, and Vital Sign Data at Visit 10 and Change From Baseline

**eTable 4.** Summary of Treatment-Emergent Adverse Events

**eTable 5.** Summary of Related Treatment-Emergent Adverse Events by System Organ Class and Preferred Term

**eTable 6.** Population Excluding Ulcers Reduced  $\geq 10\%$  During Screening

**eFigure 1.** ON101 Promotes Wound Healing Through Regulating M1 and M2 Macrophages

**eFigure 2.** Time to Healing in mITT

This supplementary material has been provided by the authors to give readers additional information about their work.

## eMethods 1. Randomization Plan

Subjects enrolled in this trial are to be randomized according to the following protocol.

1. Thirty random numbers are to be generated for each study site, with 15 generated for each of the two treatment groups.
2. Each randomization number has the format R001 to R030 that will be unique per site, but not unique across the study.
3. The package containing the sealed envelopes for each RCT study site will be mailed by post to a site representative before the site initiation visit.
4. Upon receipt of the sealed envelopes, the responsible site personnel will acknowledge delivery and confirm the envelopes were fully sealed upon receipt by signing a letter sent from an independent contract research organization which generates a randomization code.
5. The sealed randomization envelope will not disclose the group.
6. Each envelope will measure 2 1/2 inches by 4 1/4 inches, sealed with a label measuring 1 inch by 3 inches.
7. Once a subject is confirmed eligible, he/she will receive a sequential randomization number at baseline (Day 1) (i.e., the next eligible subject will always receive the lowest available randomization number).

- Flow Chart for Randomization:

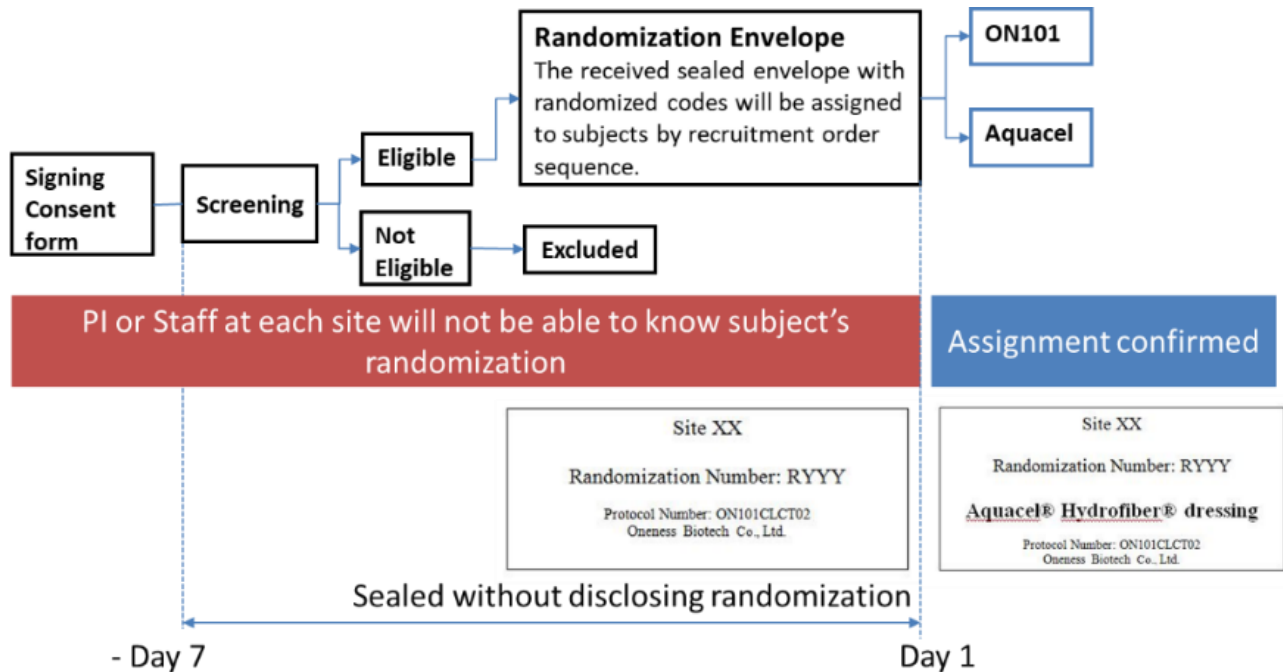

## eMethods 2. Procedure of Healing Judgment by Independent Evaluator

### 1. Standardized Photographing Procedure

Camera setting: mode, still image size, shutter timing, EV, ISO, white balance, AF, etc.

Three images for the target ulcer (labeled with the patient no., site no., data of visit, and visit no.) will include one with the whole foot and three with a closer view from three angles.

### 2. Blinded Coding

- An independent staff member will assign codes to the images of each target ulcer by sequential order according to the time of receipt (new codes will replace the label on the target ulcer image so that the information of patient and site numbers, date of visit, and visit number will not be disclosed, to ensure blindness).
- A second independent staff member will verify the blinded coding in the encrypted database.
- New codes are entered into the Independent Blinded Evaluation for Wound Healing form for printing.
- A second independent staff member will deliver this evaluation form with digital images saved on a laptop to the independent blinded evaluator.

### 3. Target Ulcer Photographing and Sequential Coding by Blinded Procedure:

### 4. Examples of Images and Coding

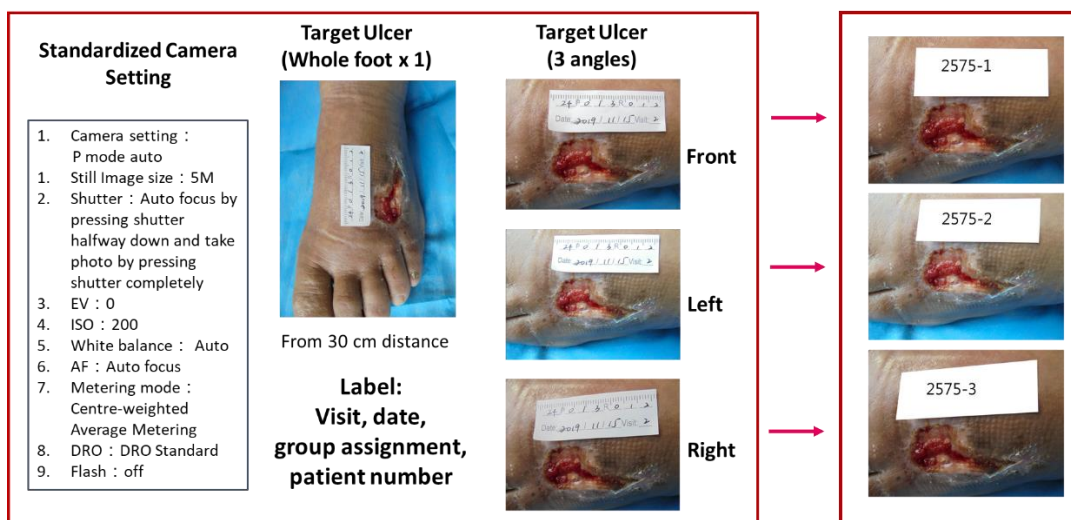

5. Blinded Evaluation & Records - Blinded evaluation procedure

- a. The independent evaluator will judge the ulcer's healing status based on sequentially coded images and complete the evaluation form.
- b. A second independent staff member will retrieve the images and evaluation form. The independent evaluator will not keep any records.
- c. The second independent staff member will send the encrypted evaluation results to the study site.
- d. The staff of the study site will record the evaluation results by the independent evaluator in the case report form.
- e. Evaluation and recording need to be completed on the same day.

6. Examples of Blinded Evaluation



| Independent Blinded Evaluation for Wound Healing                                                                                                      |                                                                                                                                                                                                                                                                                                             |                  |
|-------------------------------------------------------------------------------------------------------------------------------------------------------|-------------------------------------------------------------------------------------------------------------------------------------------------------------------------------------------------------------------------------------------------------------------------------------------------------------|------------------|
| Protocol No.: OHSU/CCTC/12                                                                                                                            | IP Name: WH-1 Outpatient                                                                                                                                                                                                                                                                                    | Image No.: _____ |
| Protocol Title:<br>Randomized Controlled Study to Evaluate the Efficacy and Safety of WH-1 Ointment for the Treatment of Chronic Diabetic Foot Ulcers |                                                                                                                                                                                                                                                                                                             |                  |
| Wagner Staging                                                                                                                                        | <input type="checkbox"/> Grade 0: pre-ulcerative lesions, healed ulcers<br><input type="checkbox"/> Grade 1: Superficial ulcer<br><input type="checkbox"/> Grade 2: Deep ulcers<br><input type="checkbox"/> Grade 3: Deep ulcers with osteitis, abscess or osteomyelitis<br><input type="checkbox"/> Others |                  |
| Healed Ulcer                                                                                                                                          | <input type="checkbox"/> Yes<br><input type="checkbox"/> No<br><input type="checkbox"/> Epithelialized<br><input type="checkbox"/> Macerated<br><input type="checkbox"/> Scab<br><input type="checkbox"/> Exposed tissue<br><input type="checkbox"/> Granulation tissue                                     |                  |
| Signature of Reviewer: _____                                                                                                                          |                                                                                                                                                                                                                                                                                                             | Date: _____      |

7. Example of one patient's coding number in different visits:

V5

**Independent Blinded Evaluation for Wound Healing** 2659

|               |             |          |               |            |      |
|---------------|-------------|----------|---------------|------------|------|
| Protocol No.: | ON101CLCT02 | IP Name: | WH-1 Ointment | Image No.: | 2659 |
|---------------|-------------|----------|---------------|------------|------|

Protocol Title:  
Randomized Controlled Study to Evaluate the Efficacy and Safety of WH-1 Ointment for the Treatment of Chronic Diabetic Foot Ulcers

|                |                                                                                                                                                                                                                                                                                                                        |  |  |  |  |
|----------------|------------------------------------------------------------------------------------------------------------------------------------------------------------------------------------------------------------------------------------------------------------------------------------------------------------------------|--|--|--|--|
| Wagner Staging | <input type="checkbox"/> Grade 0: pre-ulcerative lesions, healed ulcers<br><input checked="" type="checkbox"/> Grade 1: Superficial ulcer<br><input type="checkbox"/> Grade 2: Deep ulcers<br><input type="checkbox"/> Grade 3: Deep ulcers with osteitis, abscess or osteomyelitis<br><input type="checkbox"/> Others |  |  |  |  |
|----------------|------------------------------------------------------------------------------------------------------------------------------------------------------------------------------------------------------------------------------------------------------------------------------------------------------------------------|--|--|--|--|

|              |                                                                        |  |                                                                                                                                                                                                                     |  |  |
|--------------|------------------------------------------------------------------------|--|---------------------------------------------------------------------------------------------------------------------------------------------------------------------------------------------------------------------|--|--|
| Healed Ulcer | <input type="checkbox"/> Yes<br><input checked="" type="checkbox"/> No |  | <input type="checkbox"/> Epithelialized<br><input type="checkbox"/> Macerated<br><input checked="" type="checkbox"/> Scab<br><input type="checkbox"/> Exposed tissue<br><input type="checkbox"/> Granulation tissue |  |  |
|--------------|------------------------------------------------------------------------|--|---------------------------------------------------------------------------------------------------------------------------------------------------------------------------------------------------------------------|--|--|

Signature of Reviewer: *H. J. Chen* Date: 2019-12-25

|           |                       |
|-----------|-----------------------|
| Image No. | 2659                  |
| Site No.  | 201 P 011 R 012       |
| Visit No. | 5                     |
| Recorder  | 2019 01/20 2019 11-05 |

2 weeks  
apart

→

V6

**Independent Blinded Evaluation for Wound Healing** 2685

|               |             |          |               |            |      |
|---------------|-------------|----------|---------------|------------|------|
| Protocol No.: | ON101CLCT02 | IP Name: | WH-1 Ointment | Image No.: | 2685 |
|---------------|-------------|----------|---------------|------------|------|

Protocol Title:  
Randomized Controlled Study to Evaluate the Efficacy and Safety of WH-1 Ointment for the Treatment of Chronic Diabetic Foot Ulcers

|                |                                                                                                                                                                                                                                                                                                                        |  |  |  |  |
|----------------|------------------------------------------------------------------------------------------------------------------------------------------------------------------------------------------------------------------------------------------------------------------------------------------------------------------------|--|--|--|--|
| Wagner Staging | <input checked="" type="checkbox"/> Grade 0: pre-ulcerative lesions, healed ulcers<br><input type="checkbox"/> Grade 1: Superficial ulcer<br><input type="checkbox"/> Grade 2: Deep ulcers<br><input type="checkbox"/> Grade 3: Deep ulcers with osteitis, abscess or osteomyelitis<br><input type="checkbox"/> Others |  |  |  |  |
|----------------|------------------------------------------------------------------------------------------------------------------------------------------------------------------------------------------------------------------------------------------------------------------------------------------------------------------------|--|--|--|--|

|              |                                                                        |  |                                                                                                                                                                                                                     |  |  |
|--------------|------------------------------------------------------------------------|--|---------------------------------------------------------------------------------------------------------------------------------------------------------------------------------------------------------------------|--|--|
| Healed Ulcer | <input checked="" type="checkbox"/> Yes<br><input type="checkbox"/> No |  | <input checked="" type="checkbox"/> Epithelialized<br><input type="checkbox"/> Macerated<br><input type="checkbox"/> Scab<br><input type="checkbox"/> Exposed tissue<br><input type="checkbox"/> Granulation tissue |  |  |
|--------------|------------------------------------------------------------------------|--|---------------------------------------------------------------------------------------------------------------------------------------------------------------------------------------------------------------------|--|--|

Signature of Reviewer: *H. J. Chen* Date: 2020-1-8

|           |                       |
|-----------|-----------------------|
| Image No. | 2685                  |
| Site No.  | 201 P 011 R 012       |
| Visit No. | 6                     |
| Recorder  | 2020 01/08 2020 01-08 |

Evaluation results will be sent to study site and recorded in CRF on the same day

**eTable 1. Institutional Review Board Approval Information of 21 Medical Centers**

| Site | Site Initial | Site Name                                                                                           | IRB#                      |
|------|--------------|-----------------------------------------------------------------------------------------------------|---------------------------|
| 01   | CMUH         | China Medical University Hospital, Taiwan                                                           | DMR100-IRB-224            |
| 02   | NTUH         | National Taiwan University Hospital, Taiwan                                                         | 201209029MSA              |
| 03   | MMH          | Presbyterian Church in Taiwan Mackay Medical Foundation<br>Mackay Memorial Hospital, Taiwan         | 12CT037A                  |
| 04   | TSGH         | Tri-Services General Hospital, Taiwan                                                               | 2-101-01-021              |
| 05   | BTCGH        | Buddhist Tzu Chi Medical Foundation<br>Taipei Tzu Chi Hospital, Taiwan                              | 01-FS05-061               |
| 06   | CGMH-LK      | Chang Gung Medical Foundation<br>Linkou Chang Gung Memorial Hospital, Taiwan                        | 102-0020A                 |
| 07   | CMMC         | Chi-Mei Medical Center, Taiwan                                                                      | 10207-006                 |
| 08   | CMUH-BG      | China Medical University BeiGang Hospital, Taiwan                                                   | DMR100-IRB-224            |
| 09   | MMH-TS       | Presbyterian Church in Taiwan Mackay Medical Foundation<br>Tamshui Mackay Memorial Hospital, Taiwan | 12CT037A                  |
| 10   | CGMH-KH      | Chang Gung Medical Foundation<br>Kaohsiung Chang Gung Memorial Hospital, Taiwan                     | 102-0020A                 |
| 11   | TPVGH        | Taipei Veterans General Hospital, Taiwan                                                            | 2016-04-006B              |
| 21   | LPP          | Limb Preservation Platform, Inc., US (LPP)                                                          | IRB tracking<br>#20180770 |
| 22   | RJH          | Ruijin Hospital, Shanghai Jiaotong University School of<br>Medicine, China (RJH)                    | (2018)伦审第(65)<br>号        |
| 23   | SDFH         | The First Affiliated Hospital of Soochow University, China<br>(SDFH)                                | (2017)伦审批第<br>189 号       |
| 24   | JSUH         | Affiliated Hospital of Jiangsu University, China (JSUH)                                             | (2018)伦审第(05)<br>号        |
| 25   | HNFH         | The First Affiliated Hospital of Henan Science & Technology<br>University, China (HNFH)             | 2018-007                  |
| 26   | STCMIH       | Shanghai TCM-Interated Hospital, China (STCMIH)                                                     | 2018-018-1                |
| 27   | ZSFH         | The First Affiliated Hospital, Sun Yat-sen University, China<br>(ZSFH)                              | 2018-058-01               |
| 28   | NFH          | Nanfang Hospital of Southern Medical University, China (NFH)                                        | NFEC-2018-132             |
| 29   | SYSH         | Sun Yat-sen Memorial Hospital, Sun Yat-sen University, China<br>(SYSH)                              | 2019-YW-026               |
| 30   | SDPH         | Shandong Provincial Hospital, China (SDPH)                                                          | (2019)伦审第(38)<br>号        |

**eTable 2. Efficacy and Safety Outcomes of the mITT Population**

|                                                                                   | <b>ON101<br/>(n=118)</b> | <b>Hydrocolloid<br/>dressing<br/>(n=112)</b> | <b>Significance</b>                                           |
|-----------------------------------------------------------------------------------|--------------------------|----------------------------------------------|---------------------------------------------------------------|
| <b>Primary outcome (mITT)</b>                                                     |                          |                                              |                                                               |
| Percentage of complete healing (n) (%)                                            | 73 (61.9%)               | 38 (33.9%)                                   | OR (95% CI) 3.15 (1.82-5.43); p<0.0001 †                      |
| <b>Secondary outcomes (mITT)</b>                                                  |                          |                                              |                                                               |
| Healing time of 50 <sup>th</sup> percentile of healed population, days (95% CI) ¶ | 98                       | NA                                           | Hazard ratio (95% CI); p-value †<br>1.91 (1.29-2.83); p=0.001 |
| Incidence of infection of the target ulcer                                        | 4 (3.39%)                | 7 (6.25%)                                    | p=0.365*                                                      |
| Ulcer recurrence in the follow-up period <sup>#</sup>                             | 15 (20.55%)              | 6 (15.79%)                                   | p=0.617*                                                      |

†Odds ratio and Hazard ratio with 95% CI and p-value using logistic regression model adjusted for treatment (fixed factor), baseline wound size in cm<sup>2</sup> and Wagner grade (covariates); ¶ Kaplan-Meier method; \* Fisher's exact test.;  
<sup>#</sup> Ulcer recurrence was recorded once ulcer was completely healed and was observed during the follow-up period;  
 NA: Not analysable, because till the end of treatment period the number of healed ulcers did not reach to 50% of total number in group.

**eTable 3. Hematology, Biochemistry, and Vital Sign Data at Visit 10 and Change From Baseline\***

| Parameter                       | Status          | ON101 Cream<br>N = 122 | Hydrofiber<br>dressing<br>N = 114 | P-value |
|---------------------------------|-----------------|------------------------|-----------------------------------|---------|
| Hemoglobin (g/dL)               | Mean (STD)      | 13.0(1.8)              | 12.6 (1.8)                        | 0.148   |
|                                 | CFB, Mean (STD) | 0.4 (1.2)              | 0.3 (1.3)                         | 0.305   |
| RBC (10 <sup>6</sup> /uL)       | Mean (STD)      | 4.5 (0.7)              | 4.5 (0.8)                         | 0.946   |
|                                 | CFB, Mean (STD) | 0.1 (0.4)              | 0.1 (0.5)                         | 0.930   |
| Platelet (10 <sup>3</sup> /uL)  | Mean (STD)      | 242 (77.6)             | 259 (91.7)                        | 0.126   |
|                                 | CFB, Mean (STD) | -14 (65.6)             | 2.5 (67.6)                        | 0.048   |
| WBC (10 <sup>3</sup> /uL)       | Mean (STD)      | 8.1 (3.0)              | 8.2 (2.5)                         | 0.809   |
|                                 | CFB, Mean (STD) | 0.4 (2.7)              | 0.7 (2.0)                         | 0.402   |
| Basophil (%)                    | Mean (STD)      | 0.5 (0.4)              | 0.5 (0.4)                         | 0.851   |
|                                 | CFB, Mean (STD) | -0.0 (0.5)             | -0.0 (0.3)                        | 0.943   |
| Eosinophil (%)                  | Mean (STD)      | 2.7 (1.7)              | 3.2 (2.3)                         | 0.037   |
|                                 | CFB, Mean (STD) | -0.3 (2.2)             | -0.5 (2.8)                        | 0.196   |
| Lymphocyte (%)                  | Mean (STD)      | 27.6 (9.5)             | 28.6 (8.5)                        | 0.425   |
|                                 | CFB, Mean (STD) | 0.0 (7.9)              | 1.2 (7.5)                         | 0.259   |
| Monocyte (%)                    | Mean (STD)      | 6.1 (1.8)              | 6.1 (1.8)                         | 0.920   |
|                                 | CFB, Mean (STD) | -0.1 (1.8)             | -0.3 (1.8)                        | 0.451   |
| Neutrophil (%)                  | Mean (STD)      | 63.1 (10.3)            | 61.5 (9.8)                        | 0.248   |
|                                 | CFB, Mean (STD) | 0.4 (9.6)              | -0.4 (8.3)                        | 0.347   |
| HbA1c (%)                       | Mean (STD)      | 8.0 (1.8)              | 7.9 (1.6)                         | 0.818   |
|                                 | CFB, Mean (STD) | -0.1 (1.6)             | -0.2 (1.4)                        | 0.580   |
| Fasting glucose(mg/dL)          | Mean (STD)      | 159 (59.5)             | 156 (65.3)                        | 0.768   |
|                                 | CFB, Mean (STD) | 0.8 (64.9)             | 5.6 (75.4)                        | 0.674   |
| AST (IU/L)                      | Mean (STD)      | 20.4 (9.4)             | 20.6 (7.6)                        | 0.864   |
|                                 | CFB, Mean (STD) | -0.2 (9.6)             | -0.2 (8.1)                        | 0.907   |
| ALT (IU/L)                      | Mean (STD)      | 19.2 (10.3)            | 19.7 (10.8)                       | 0.710   |
|                                 | CFB, Mean (STD) | -1.4(12.1)             | 0.9(10.0)                         | 0.274   |
| Albumin (g/dL)                  | Mean (STD)      | 4.0( 0.5)              | 4.1( 0.5)                         | 0.269   |
|                                 | CFB, Mean (STD) | 0.0( 0.4)              | 0.1( 0.4)                         | 0.225   |
| Creatinine(mg/dL)               | Mean (STD)      | 1.1( 0.5)              | 1.1( 0.5)                         | 0.815   |
|                                 | CFB, Mean (STD) | 0.1( 0.3)              | 0.1( 0.2)                         | 0.959   |
| BUN (mg/dL)                     | Mean (STD)      | 22.4(13.8)             | 20.9( 8.8)                        | 0.38    |
|                                 | CFB, Mean (STD) | 1.9(12.5)              | 0.9( 6.7)                         | 0.392   |
| Body weight (kg)                | Mean (STD)      | 74.0(16.7)             | 76.1(18.1)                        | 0.360   |
|                                 | CFB, Mean (STD) | 0.7( 3.1)              | 0.3( 3.1)                         | 0.430   |
| Systolic blood pressure (mmHg)  | Mean (STD)      | 134(18.4)              | 132(16.8)                         | 0.302   |
|                                 | CFB, Mean (STD) | -0.6(19.3)             | -1.1(18.5)                        | 0.636   |
| Diastolic blood pressure (mmHg) | Mean (STD)      | 78.6(12.9)             | 76.2(10.4)                        | 0.132   |
|                                 | CFB, Mean (STD) | -1.0(13.0)             | -1.2(11.8)                        | 0.313   |

V10, visit 10, end of treatment: \*CFB, change from baseline, means the changed value at Visit 10 ( end of treatment) from baseline (screening visit). P value was conducted by ANOVA



**eTable 4. Summary of Treatment-Emergent Adverse Events\***

| <b>System Organ Class</b>                                   | <b>Preferred Term</b>               | <b>ON101 Cream<br/>N = 122</b> | <b>Hydrocolloid<br/>dressing<br/>N = 114</b> |
|-------------------------------------------------------------|-------------------------------------|--------------------------------|----------------------------------------------|
|                                                             |                                     | n (%) E                        | n (%) E                                      |
| <b>Patients with any AE</b>                                 |                                     | 93 (76.2%) 368                 | 90 (78.9%) 387                               |
| <b>Blood and lymphatic system disorders</b>                 | Total                               | 2 (1.6%) 3                     | 4 (3.5%) 4                                   |
|                                                             | Anaemia                             | 2 (1.6%) 3                     | 3 (2.6%) 3                                   |
| <b>Eye disorders</b>                                        | Total                               | 6 (4.9%) 8                     | 8 (7.0%) 14                                  |
|                                                             | Cataract                            | 1 (0.8%) 1                     | 3 (2.6%) 3                                   |
|                                                             | Diabetic eye disease                | 3 (2.5%) 3                     | 2 (1.8%) 2                                   |
| <b>Gastrointestinal disorders</b>                           | Total                               | 10 (8.2%) 11                   | 4 (3.5%) 7                                   |
|                                                             | Constipation                        | 5 (4.1%) 5                     | 0 (0.0%) 0                                   |
| <b>General disorders and administration site conditions</b> | Total                               | 9 (7.4%) 9                     | 13 (11.4%) 14                                |
|                                                             | Peripheral Swelling                 | 1 (0.8%) 1                     | 4 (3.5%) 4                                   |
|                                                             | Pyrexia                             | 2 (1.6%) 2                     | 3 (2.6%) 3                                   |
| <b>Infections and infestations</b>                          | Total                               | 32 (26.2%) 43                  | 33 (28.9%) 44                                |
|                                                             | Abscess limb                        | 4 (3.3%) 4                     | 2 (1.8%) 2                                   |
|                                                             | Cellulitis                          | 8 (6.6%) 8                     | 5 (4.4%) 5                                   |
|                                                             | Infected skin ulcer                 | 2 (1.6%) 2                     | 3 (2.6%) 3                                   |
|                                                             | Nasopharyngitis                     | 3 (2.5%) 3                     | 5 (4.4%) 5                                   |
|                                                             | Upper respiratory tract infection   | 6 (4.9%) 7                     | 7 (6.1%) 7                                   |
|                                                             | Wound infection                     | 0 (0.0%) 0                     | 3 (2.6%) 3                                   |
| <b>Injury, poisoning and procedural complications</b>       | Total                               | 11 (9.0%) 11                   | 15 (13.2%) 17                                |
|                                                             | Wound                               | 3 (2.5%) 3                     | 2 (1.8%) 2                                   |
|                                                             | Wound complication                  | 1 (0.8%) 1                     | 5 (4.4%) 6                                   |
| <b>Investigations</b>                                       | Total                               | 3 (2.5%) 4                     | 7 (6.1%) 11                                  |
|                                                             | Glomerular filtration rate decrease | 0 (0.0%) 0                     | 4 (3.5%) 5                                   |
| <b>Metabolism and nutrition disorders</b>                   | Total                               | 13 (10.7%) 15                  | 13 (11.4%) 13                                |
|                                                             | Gout                                | 3 (2.5%) 4                     | 3 (2.6%) 3                                   |
|                                                             | Hyperlipidaemia                     | 3 (2.5%) 3                     | 2 (1.8%) 2                                   |
| <b>Renal and urinary disorders</b>                          | Total                               | 7 (5.7%) 9                     | 10 (8.8%) 13                                 |
|                                                             | Chronic kidney disease              | 1 (0.8%) 1                     | 3 (2.6%) 3                                   |
|                                                             | Diabetic nephropathy                | 2 (1.6%) 2                     | 5 (4.4%) 5                                   |

| <b>System Organ Class</b>                                  | <b>Preferred Term</b> | <b>ON101 Cream<br/>N = 122</b> | <b>Hydrocolloid<br/>dressing<br/>N = 114</b> |
|------------------------------------------------------------|-----------------------|--------------------------------|----------------------------------------------|
|                                                            |                       | n (%) E                        | n (%) E                                      |
| <b>Respiratory, thoracic and<br/>mediastinal disorders</b> | Total                 | 3 (2.5%) 5                     | 3 (2.6%) 6                                   |
| <b>Skin and subcutaneous tissue<br/>disorders</b>          | Total                 | 29 (23.8%) 40                  | 29 (25.4%) 44                                |
|                                                            | Blister               | 3 (2.5%) 3                     | 2 (1.8%) 2                                   |
|                                                            | Decubitus ulcer       | 3 (2.5%) 3                     | 0 (0.0%) 0                                   |
|                                                            | Dermatitis contact    | 1 (0.8%) 1                     | 3 (2.6%) 3                                   |
|                                                            | Diabetic foot         | 5 (4.1%) 5                     | 5 (4.4%) 9                                   |
|                                                            | Eczema                | 3 (2.5%) 3                     | 4 (3.5%) 4                                   |
|                                                            | Erythema              | 2 (1.6%) 2                     | 3 (2.6%) 3                                   |
|                                                            | Pruritus              | 3 (2.5%) 3                     | 1 (0.9%) 1                                   |
|                                                            | Skin ulcer            | 14 (11.5%) 16                  | 12 (10.5%) 13                                |
| <b>Vascular disorders</b>                                  | Total                 | 8 (6.6%) 9                     | 8 (7.0%) 9                                   |
|                                                            | Hypertension          | 3 (2.5%) 3                     | 6 (5.3%) 6                                   |

n: number of patients (percentage of patients), number of events,

\* All causes occurring in  $\geq 2\%$  in either group

**eTable 5. Summary of Related Treatment-Emergent Adverse Events by System Organ Class and Preferred Term**

|                                                             | <b>Preferred Term</b>    | <b>ON101 Cream<br/>N = 122</b> | <b>Hydrocolloid<br/>dressing<br/>N = 114</b> |
|-------------------------------------------------------------|--------------------------|--------------------------------|----------------------------------------------|
|                                                             |                          | <b>n (%) Events</b>            | <b>n (%) Events</b>                          |
| <b>Any related TEAE</b>                                     |                          | 7 (5.7%) 11                    | 5 (4.4%) 5                                   |
| <b>General disorders and administration site conditions</b> | Peripheral swelling      | 1 (0.8%) 1                     | 0 (0.0%) 0                                   |
|                                                             | Pyrexia                  | 0 (0.0%) 0                     | 1 (0.9%) 1                                   |
| <b>Infections and infestations</b>                          | Cellulitis               | 0 (0.0%) 0                     | 1 (0.9%) 1                                   |
|                                                             | Osteomyelitis            | 0 (0.0%) 0                     | 1 (0.9%) 1                                   |
|                                                             | Staphylococcal infection | 1 (0.8%) 1                     | 0 (0%) 0                                     |
| <b>Injury, poisoning and procedural complications</b>       | Wound complication       | 1 (0.8%) 1                     | 0 (0.0%) 0                                   |
| <b>Investigations</b>                                       | Weight increased         | 1 (0.8%) 1                     | 0 (0.0%) 0                                   |
| <b>Metabolism and nutrition disorders</b>                   | Hyperuricaemia           | 2 (1.6%) 2                     | 0 (0.0%) 0                                   |
| <b>Neoplasms benign, malignant and unspecified</b>          | Skin papilloma           | 0 (0.0%) 0                     | 1 (0.9%) 1                                   |
| <b>Skin and subcutaneous tissue disorders</b>               | Dermatitis contact       | 1 (0.8%) 1                     | 0 (0.0%) 0                                   |
|                                                             | Diabetic foot infection  | 0 (0.0%) 0                     | 1 (0.9%) 1                                   |
|                                                             | Eczema                   | 2 (1.6%) 2                     | 0 (0.0%) 0                                   |
|                                                             | Erythema                 | 1 (0.8%) 1                     | 0 (0.0%) 0                                   |
|                                                             | Rash                     | 1 (0.8%) 1                     | 0 (0.0%) 0                                   |

SOC, system organ class; PT, preferred term

**eTable 6. Population Excluding Ulcers Reduced  $\geq$  10% During Screening**

| <b>Population excluding ulcers reduced <math>\geq</math>10% during screening</b>                                                                                                  | <b>ON101 Cream</b> | <b>Hydrocolloid dressing</b> | <b>Odds ratio*</b> | <b>P-value**</b> |
|-----------------------------------------------------------------------------------------------------------------------------------------------------------------------------------|--------------------|------------------------------|--------------------|------------------|
| <b>N</b>                                                                                                                                                                          | 64                 | 66                           |                    |                  |
| <b>Complete healing</b>                                                                                                                                                           | 32(50.0%)          | 18(27.3%)                    | 2.44(1.16,5.15)    | 0.0077           |
| <b>Non-complete healing</b>                                                                                                                                                       | 32(50.0%)          | 48(72.7%)                    | 0.0190             |                  |
| *: Odds ratio with 95% CI and p-value using logistic regression model adjusted by treatment (fixed factor), baseline wound size in cm <sup>2</sup> and Wagner grade (covariates). |                    |                              |                    |                  |
| **: Chi-square test                                                                                                                                                               |                    |                              |                    |                  |

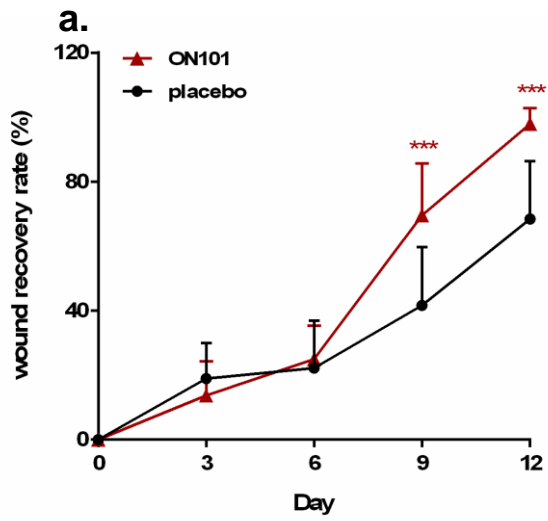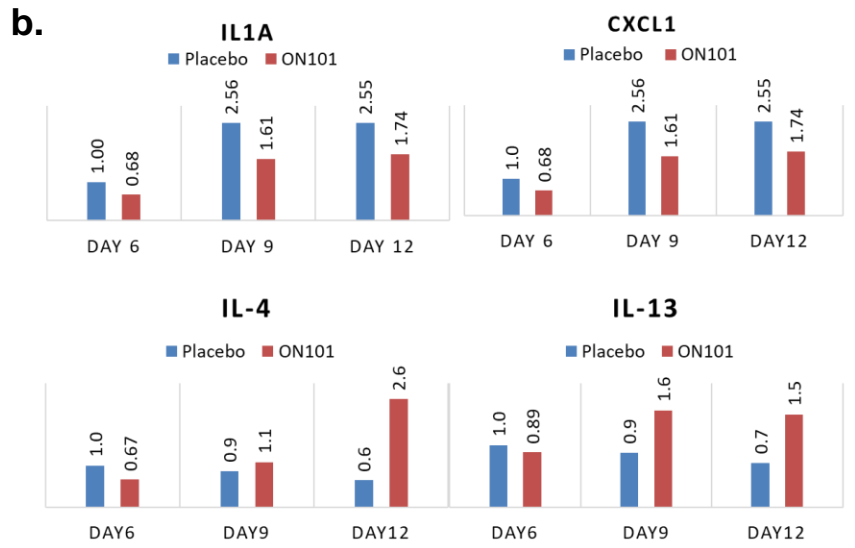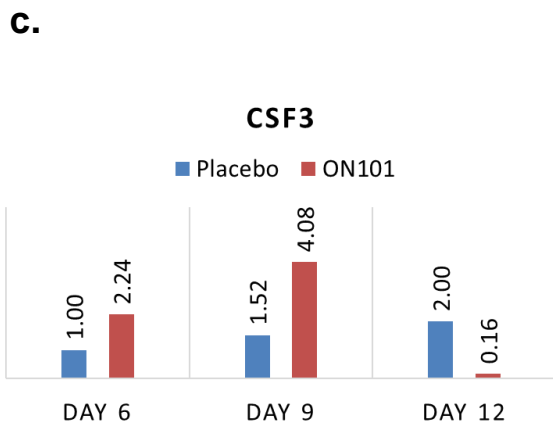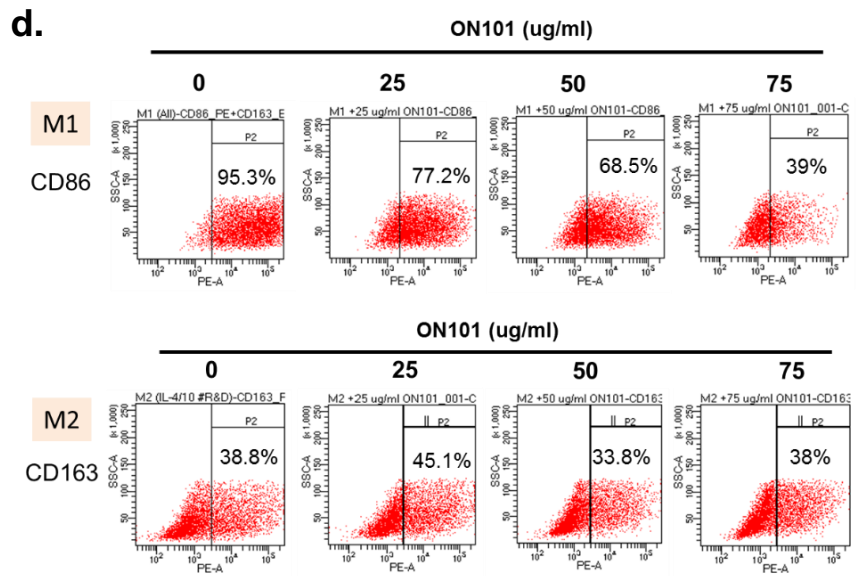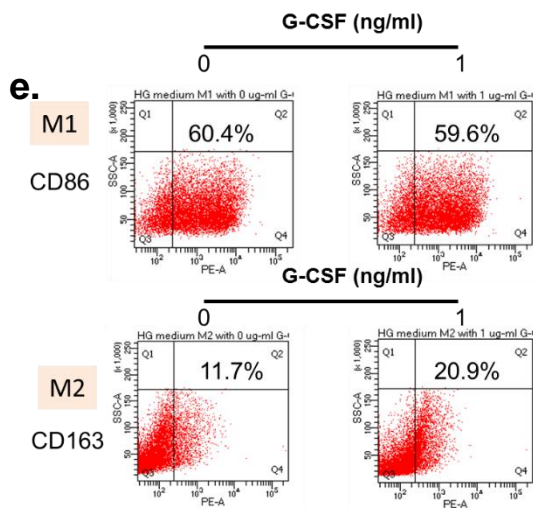

**eFigure 1. ON101 Promotes Wound Healing Through Regulating M1 and M2 Macrophages**

(a) - (c) A 6 mm- diameters wound was created on the back of Db/db mice (n=4 in each group/time point). Mice were topically applied either ON101 cream or placebo cream from day 3 after wounds were created twice daily until the harvest time. Wound size was measured and skin from wound edges were harvest at day 3, 6, 9, and 12. Total RNA was extracted for analysis gene expression by quantitative RT-PCR. (a) The averaged wound recovery rate was calculated by comparing the wound size to Day 0. \*\*\*  $p < 0.0005$ . (b) and (c) Gene expression of indicated genes by Q-PCR panel analysis. The value of Placebo group in Day6 was used as normalization control. (b)M1-associated cytokines (IL-1a and CXCL1) were down-regulated in ON101 treatment group, while M2-associated cytokines (IL-4 and IL-13) were up-regulated in ON101 treatment group comparing to placebo group. (c) CSF3 (G-CSF symbol in human) expression was up-regulated upon ON101 treatment at Day 6 and Day 9. (d) and (e) were THP-1 cell lines polarization experiments which showed the dose-dependent inhibition of M1 marker (CD86) upon ON101 treatment (e) and GCSF could enhance the proportion of M2 (CD163) by using flow cytometry analysis.

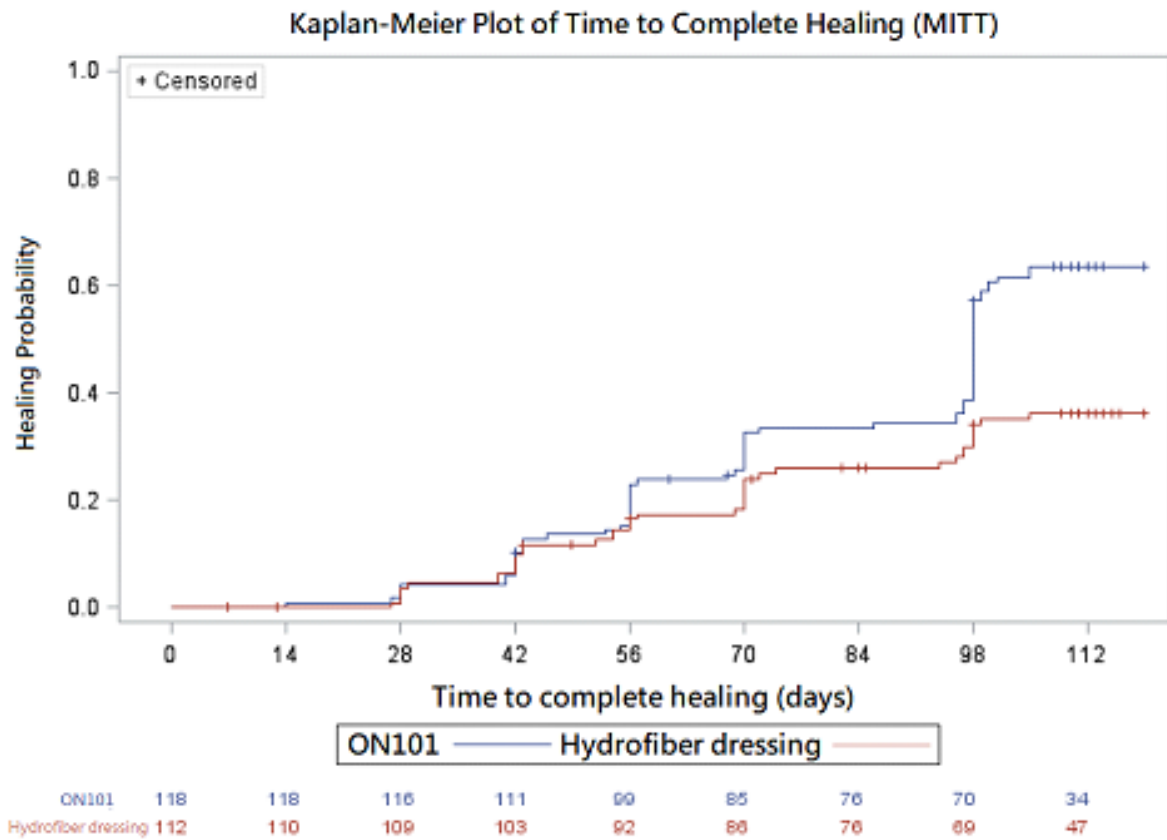

**eFigure 2. Time to Healing in mITT**

The survival curve indicates the incidence of ulcers healed at each visit. Complete healing was defined as epithelization without drainage observed at 2 continuous visits. The mITT (modified intention-to-treat) cohort randomly assigned to the Aquacel group (n=112) or ON101 group (n=118) was used for analysis by Kaplan-Meier Analysis.
