# Supplementary material for: Effect of a Novel Macrophage-Regulating Drug on Wound Healing in Patients With Diabetic Foot Ulcers: A Randomized Clinical Trial
Source: PubMed Central journal article supplement — JAMA Netw Open. 2021 Sep 3;4(9):e2122607. doi: 10.1001/jamanetworkopen.2021.22607 (PMC8417758; doi:10.1001/jamanetworkopen.2021.22607), 2021-09-03
Supplement: jamanetwopen-e2122607-s003.pdf [file jamanetwopen-e2122607-s003.pdf]

## Data Sharing Statement

Huang. Effect of a Novel Macrophage-Regulating Drug on Wound Healing in Patients With Diabetic Foot Ulcers. *JAMA Netw Open*.

Published September 03, 2021.

doi:10.1001/jamanetworkopen.2021.22607

### Data

**Data available:** Yes

**Data types:** Data dictionary

**How to access data:** [anita.lin@onenessbio.com.tw](mailto:anita.lin@onenessbio.com.tw)

**When available:** With publication

### Supporting Documents

**Document types:** None

### Additional Information

**Who can access the data:** researchers whose proposed use of the data has been approved

**Types of analyses:** for a research purpose

**Mechanisms of data availability:** after approval of a proposal
